# Supplementary material for: Impact of Weather Patterns and Meteorological Factors on PM 2.5 and O 3 during the Covid-19 Lockdown in China
Source: Copernicus journal article supplement (doi:10.5194/egusphere-2023-2425), 2023-12-04
Supplement: Supplementary file 1 [file egusphere-2023-2425-supplement.pdf]

# Supplementary Materials

## **Impact of Weather Patterns and Meteorological Factors on PM<sub>2.5</sub> and O<sub>3</sub> during the Covid-19 Lockdown in China**

Fuzhen Shen<sup>1</sup>, Michaela I. Hegglin<sup>1,2\*</sup>, Yue Yuan<sup>3</sup>

5

<sup>1</sup>Institute of Energy and Climate Research, IEK-7: Stratosphere, Forschungszentrum Jülich, 52425 Jülich, Germany

<sup>2</sup>Department of Meteorology, University of Reading, Reading, RG6 6BX, UK

<sup>3</sup>Jining Meteorological Bureau, Shandong 272000, China

*Correspondence to:* Fuzhen Shen ([f.shen@fz-juelich.de](mailto:f.shen@fz-juelich.de)); Michaela I. Hegglin ([m.i.hegglin@fz-juelich.de](mailto:m.i.hegglin@fz-juelich.de))

10

**This file includes:** Supplementary Figures 1 to 24

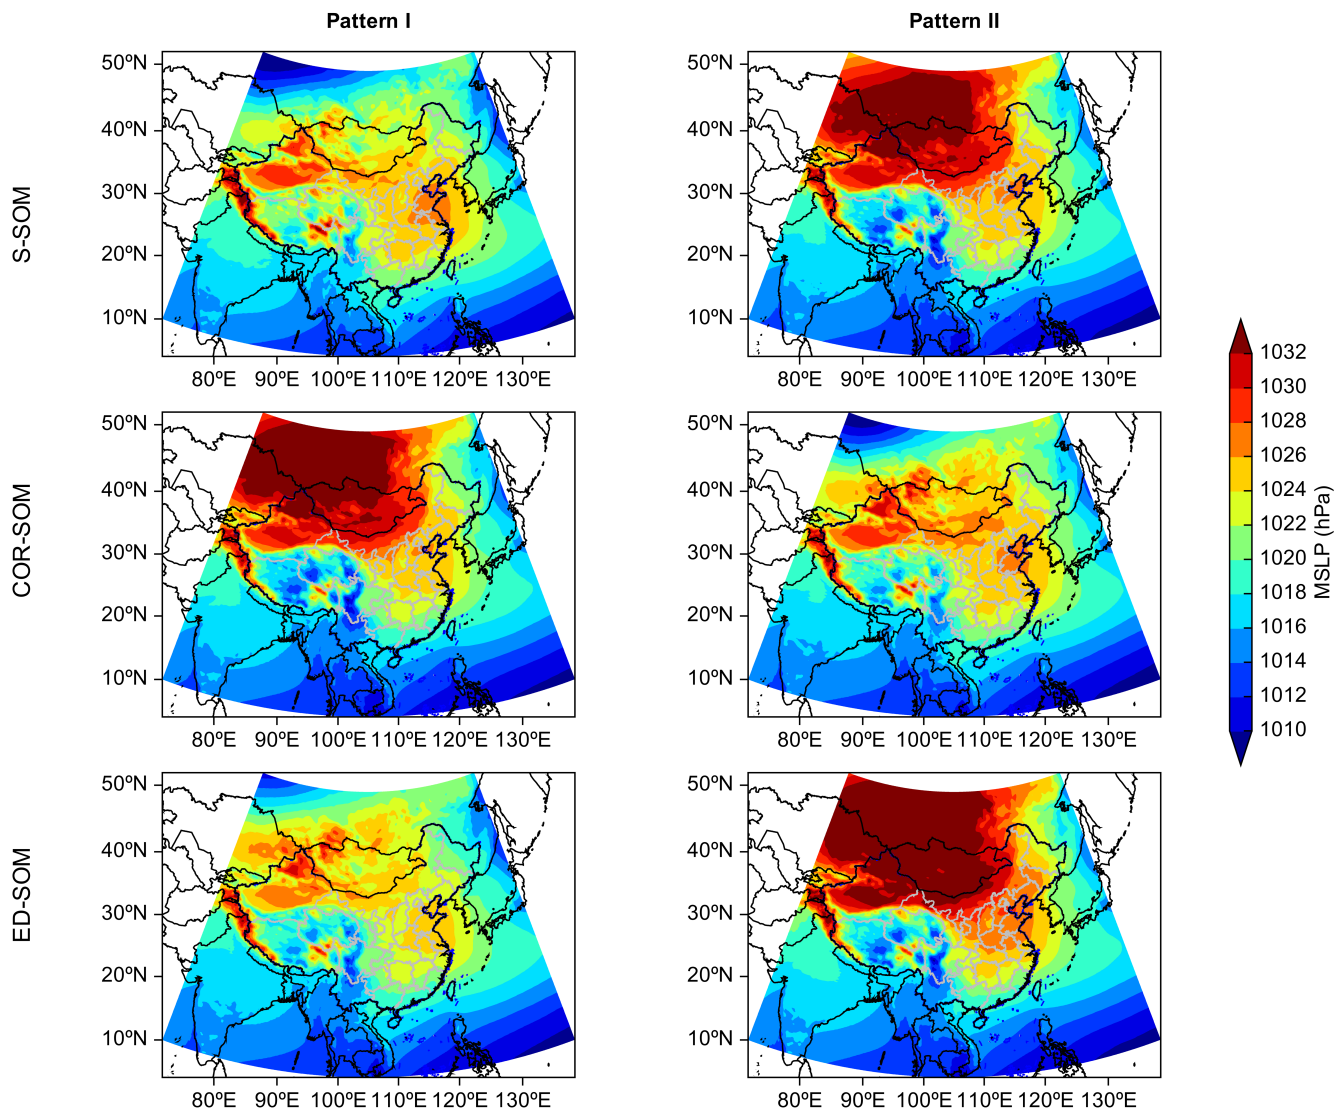

15 **Figure S1: Spatial distributions of two weather patterns for MSLP (Mean Sea Level Pressure) identified by S-SOM, COR-SOM, and ED-SOM over 2015-2020, respectively.**

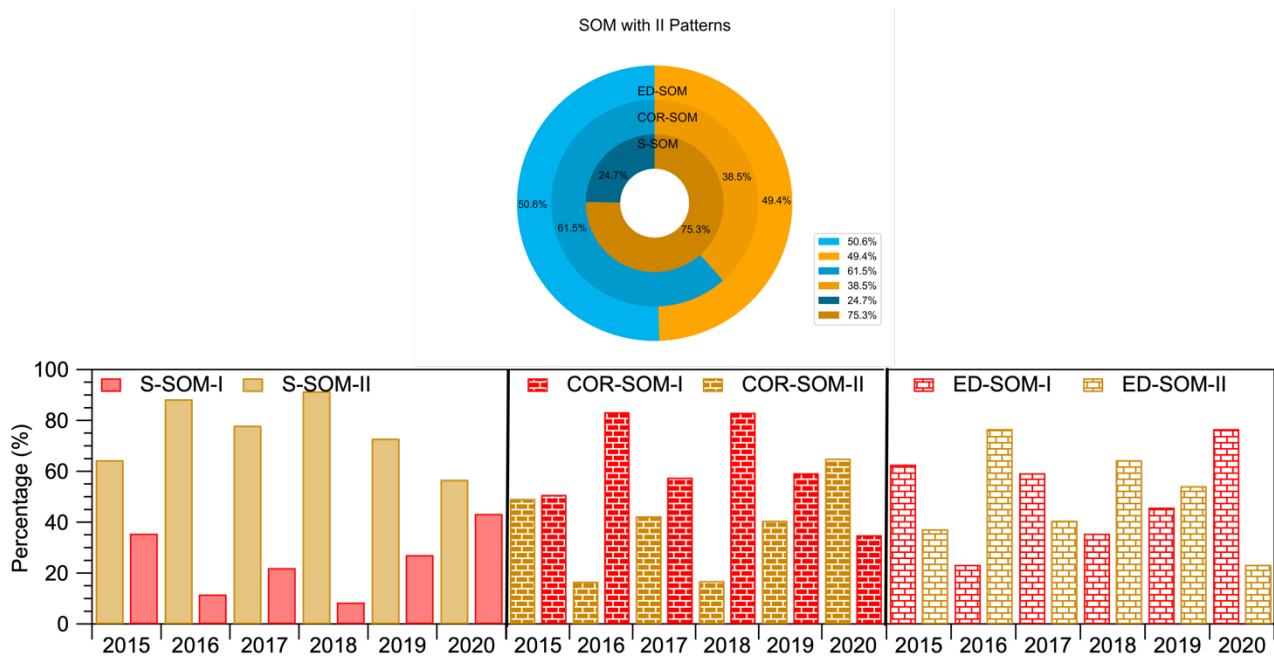

**Figure S2: Cluster size distributions of two weather patterns identified by S-SOM (inner ring), COR-SOM (middle ring) and ED-SOM (outer ring) over the years of 2015-2020 and days in each year (bar plot).**

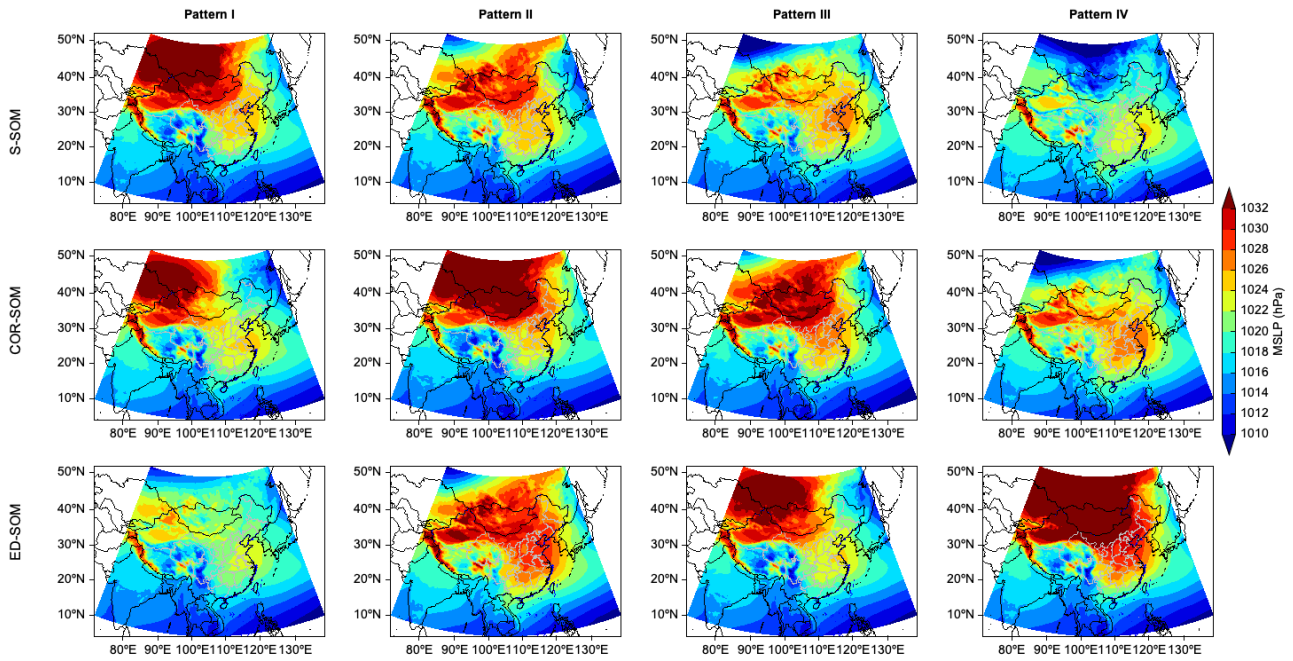

20

**Figure S3: Spatial distributions of four weather patterns for MSLP (Mean Sea Level Pressure) identified by S-SOM, COR-SOM, and ED-SOM over 2015-2020, respectively.**

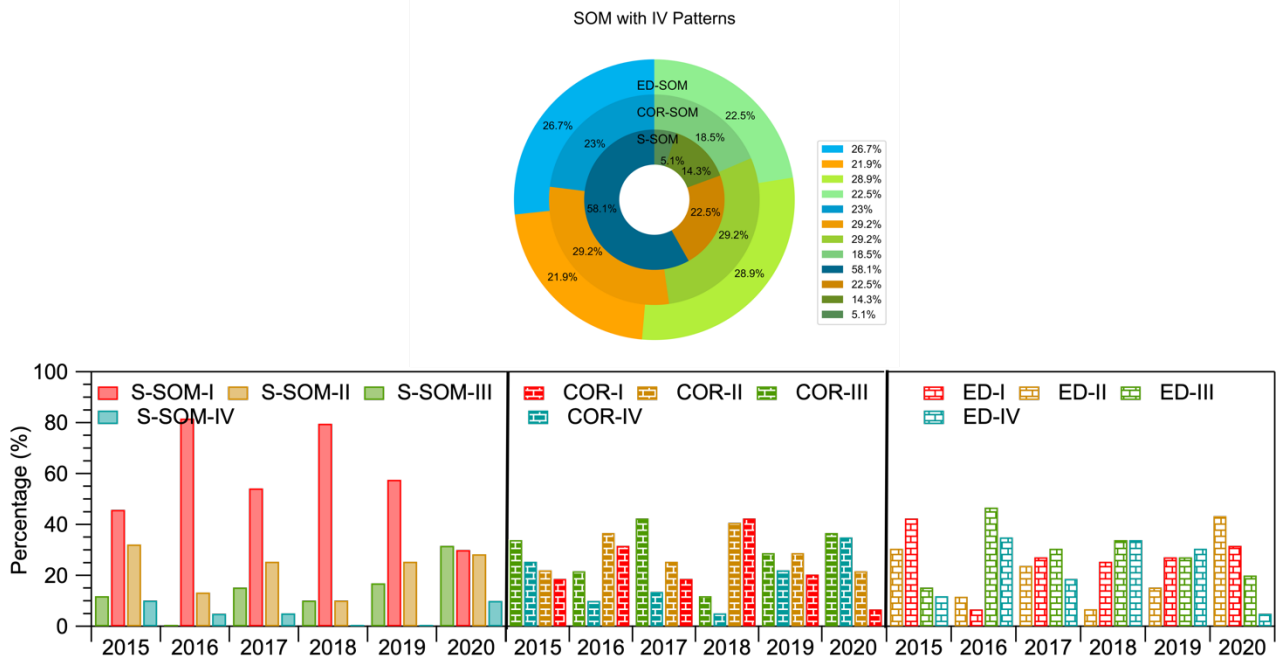

25 **Figure S4: Cluster size distributions of four weather patterns identified by S-SOM (inner ring), COR-SOM (middle ring) and ED-SOM (outer ring) over the years of 2015-2020 and days in each year (bar plot).**

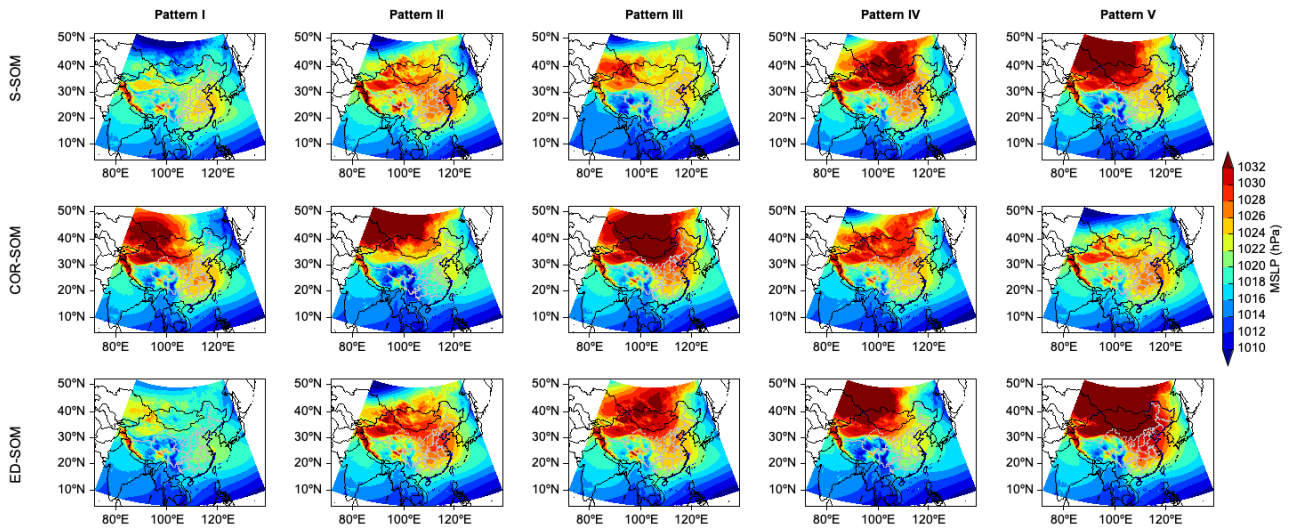

30 **Figure S5: Spatial distributions of five weather patterns for MSLP (Mean Sea Level Pressure) identified by S-SOM, COR-SOM, and ED-SOM over 2015-2020, respectively.**

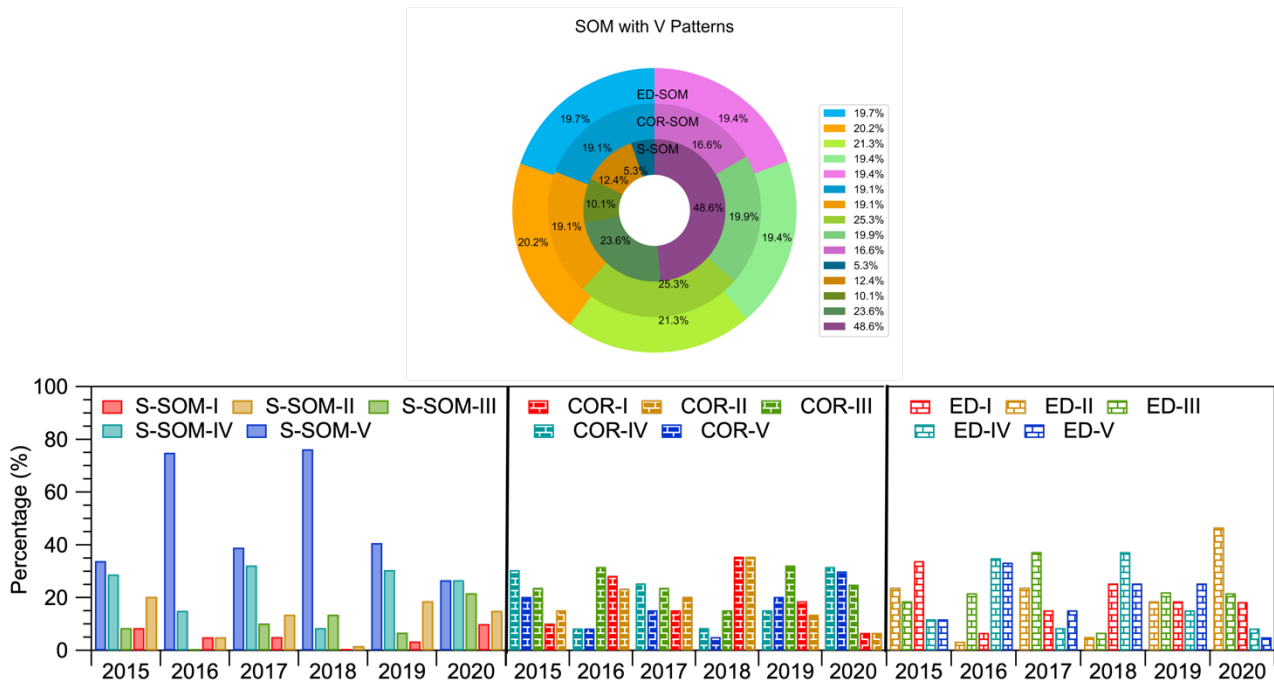

**Figure S6: Cluster size distributions of five weather patterns identified by S-SOM (inner ring), COR-SOM (middle ring) and ED-SOM (outer ring) over the years of 2015-2020 and days in each year (bar plot).**

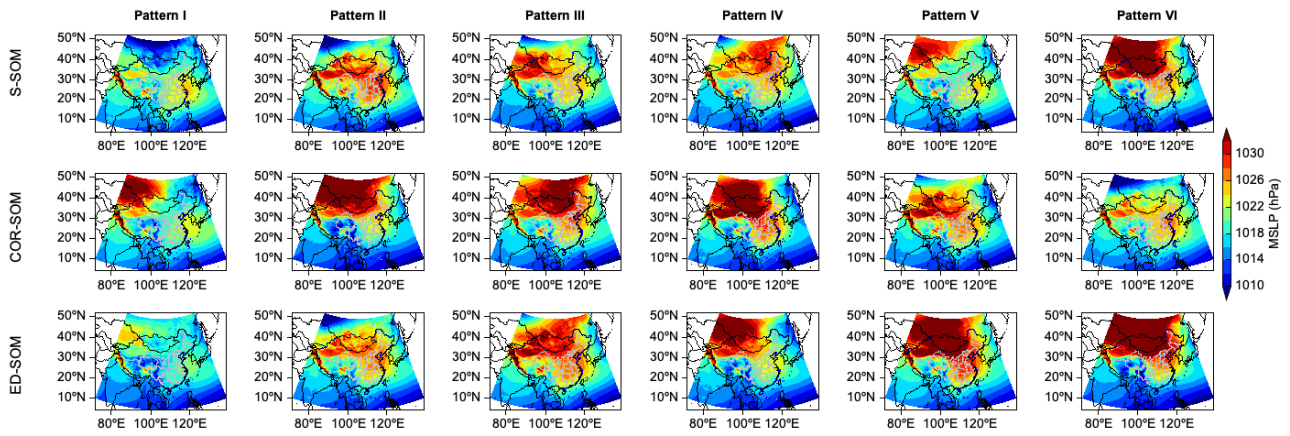

35

**Figure S7: Spatial distributions of six weather patterns for MSLP (Mean Sea Level Pressure) identified by S-SOM, COR-SOM, and ED-SOM over 2015-2020, respectively.**





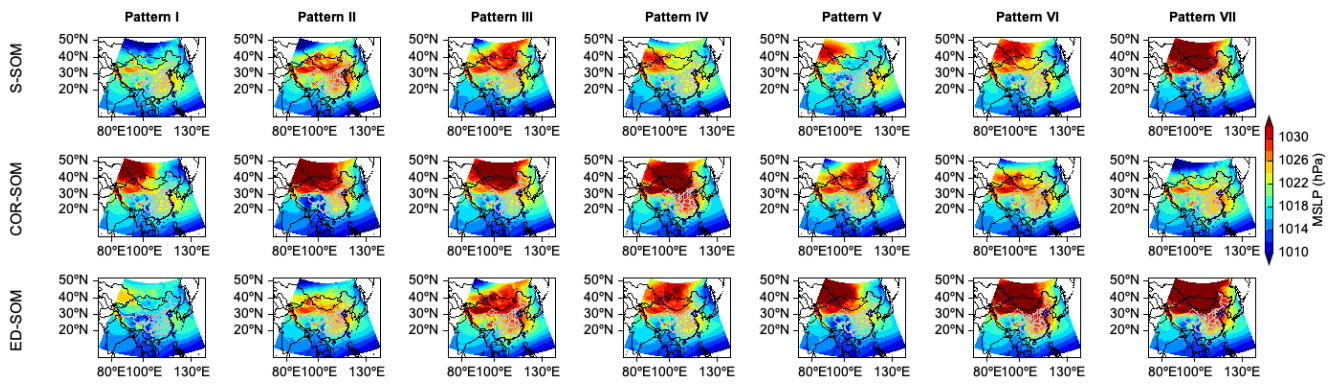

45

**Figure S9: Spatial distributions of seven weather patterns for MSLP (Mean Sea Level Pressure) identified by S-SOM, COR-SOM, and ED-SOM over 2015-2020, respectively.**



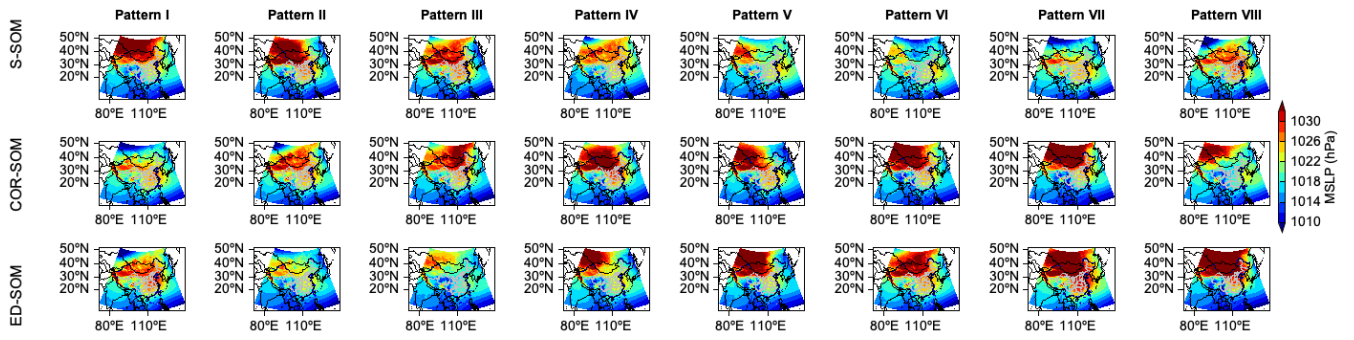

55 **Figure S11: Spatial distributions of eight weather patterns for MSLP (Mean Sea Level Pressure) identified by S-SOM, COR-SOM, and ED-SOM over 2015-2020, respectively.**

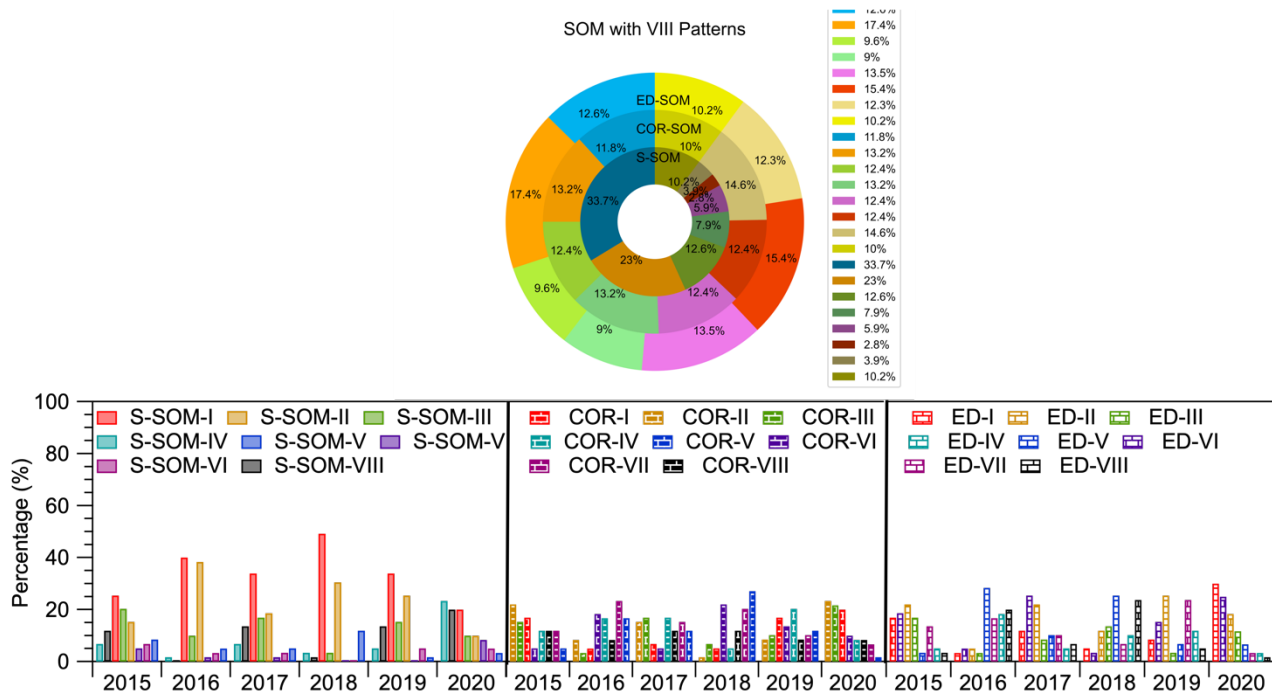

**Figure S12: Cluster size distributions of eight weather patterns identified by S-SOM (inner ring), COR-SOM (middle ring) and ED-SOM (outer ring) over the years of 2015-2020 and days in each year (bar plot).**

### VII Weather Patterns 2015-2020

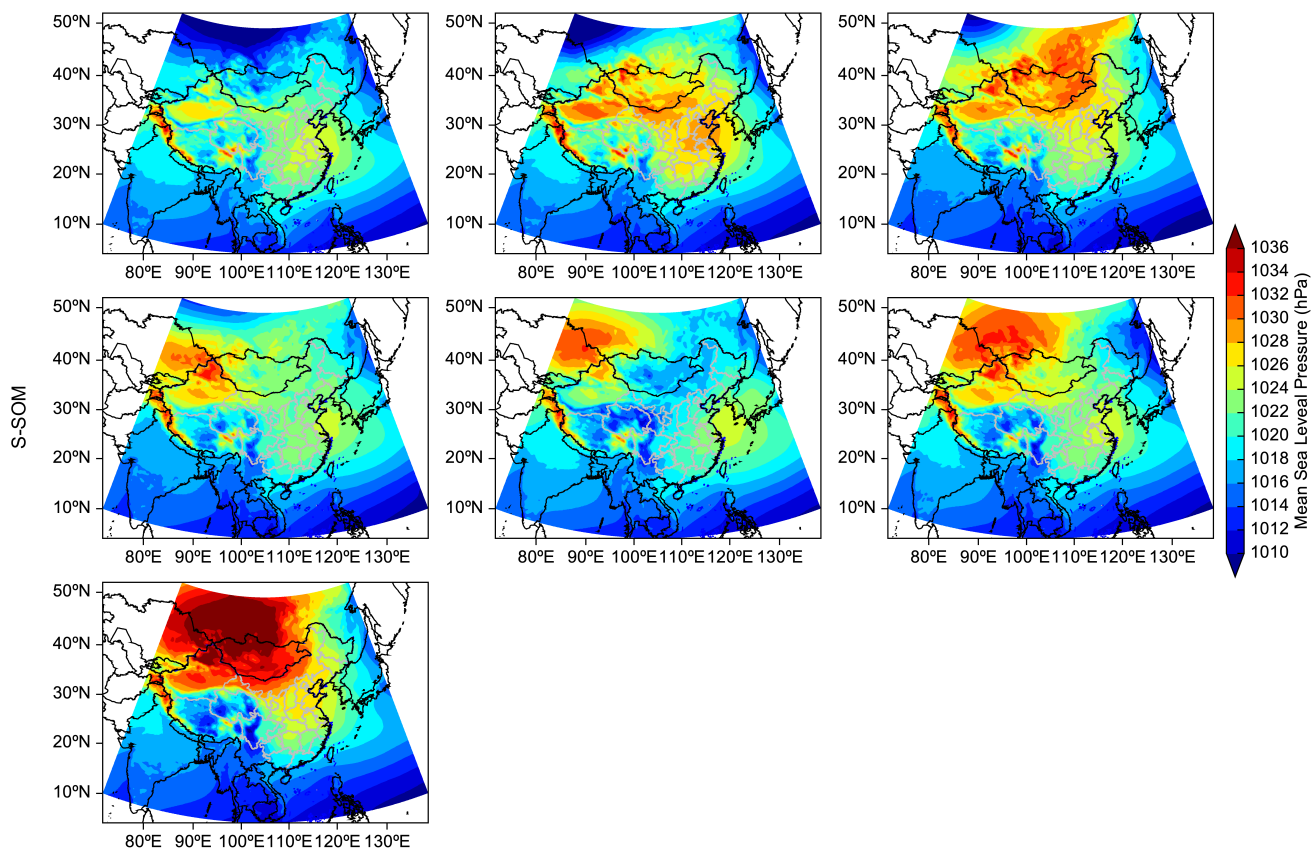

Figure S13: Spatial distributions of seven weather patterns for MSLP (Mean Sea Level Pressure) identified over 2015-2020.

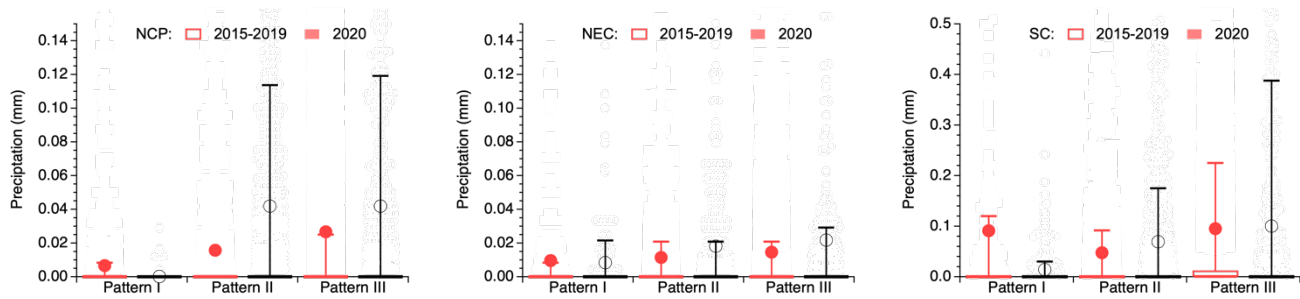

65 **Figure S14: Comparisons of Precipitation between days in 2020 (red rings and solid whisker-box) and in 2015-2019 (black rings and hollow whisker-box) in three weather patterns in NCP, NEC, and SC respectively.**





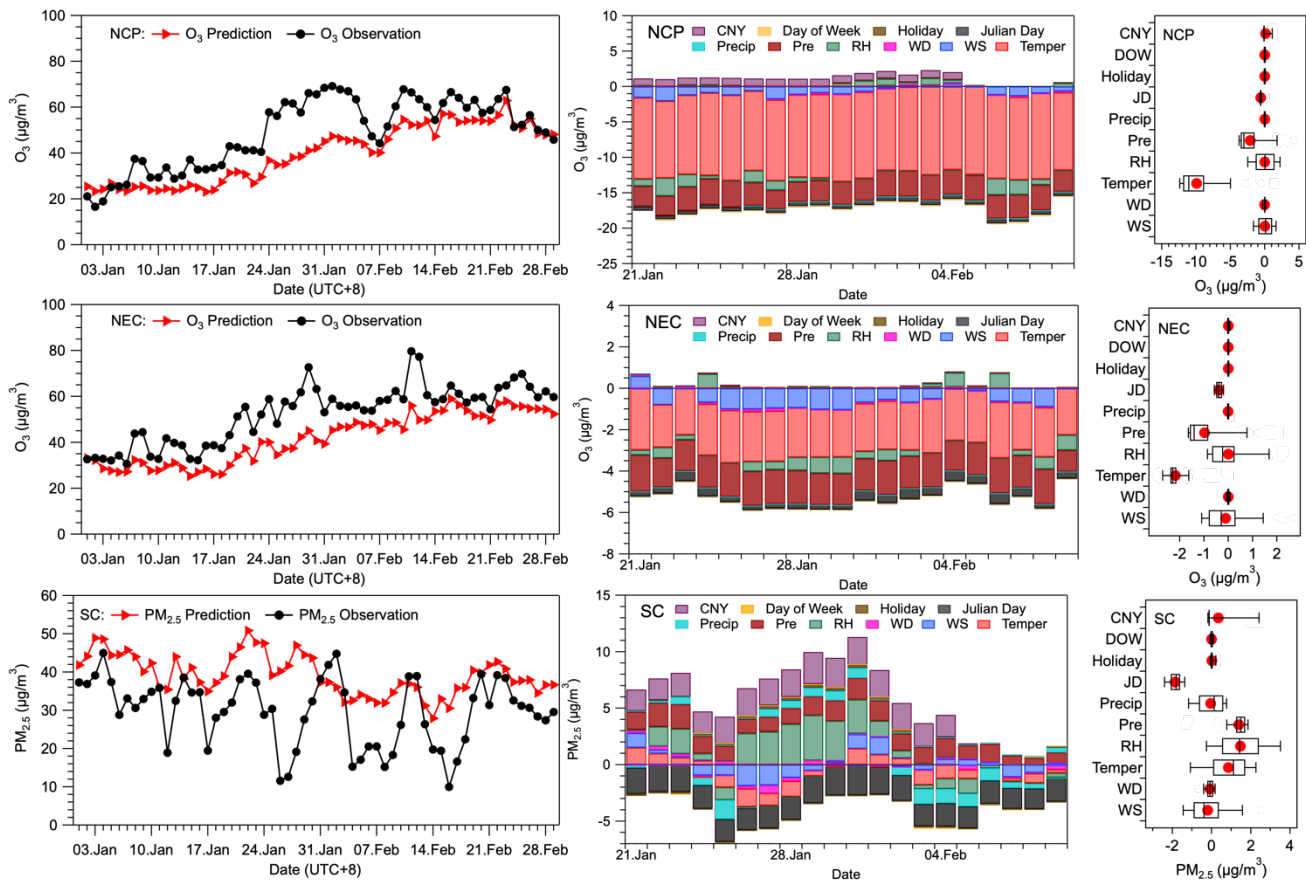

**Figure 16: Time series comparisons between observations (black dot line) and predictions (red triangle line) combined with the contributions from the input variables (colourful bar) to the  $O_3$  and  $PM_{2.5}$  change in NCP, NEC, and SC respectively. Note that the whisker-box plots represent the mean importance of the input variables during the prediction in NCP, NEC, and respectively.**

75
